# Supplementary material
Source: Springer Nature journal article supplement (https://www.springermedizin.de/resource/supplementary/13075_2009_2837_MOESM15_ESM.pdf/9693000)

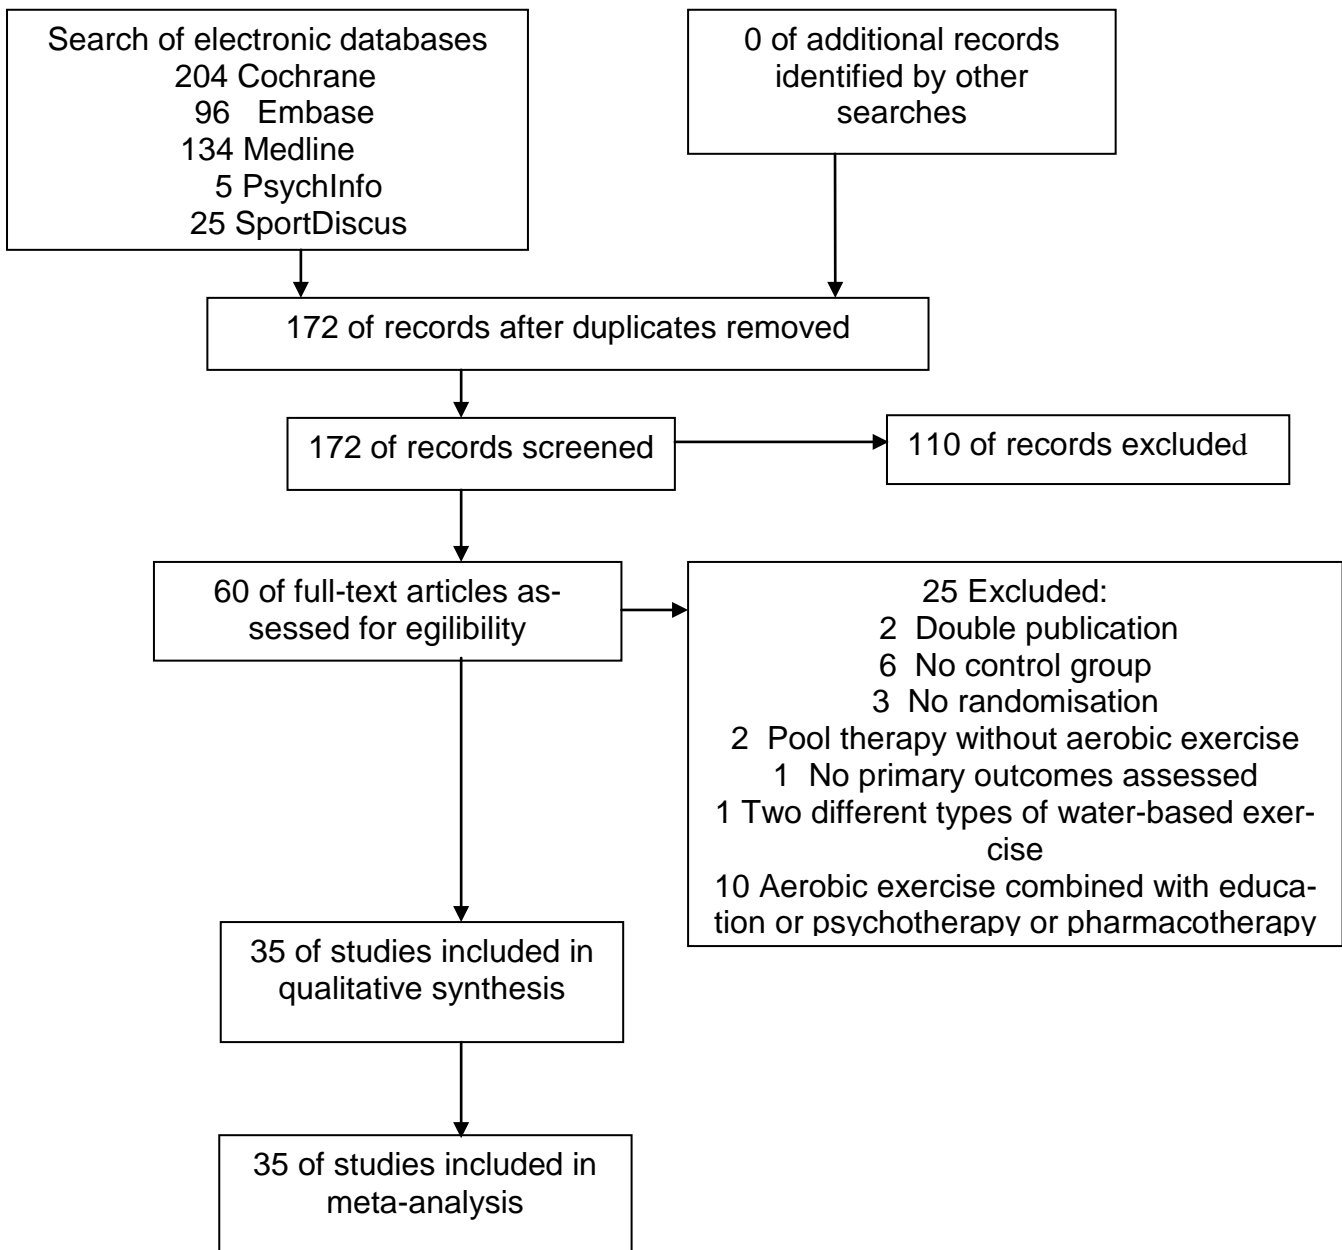

Supplement: MOESM15 [file 9693000]
